# Supplementary material
Source: publisher figshare collection journal article supplement (https://acs.figshare.com/ndownloader/files/15259706)
Supplement: Supplementary file 1 [file 15259706]

## Sheet: SupplementaryDataFile_McCallume
waterconc	tissueconc	tissuetype	experiment
1.9	8.3	muscle	Heynen et al 2016. Tissue-specific uptake of the benzodiazepine oxazepam in adult Eurasian perch (Perca fluviatilis). Environmental Chemistry, 13(5), 849-853
1.9	24.7	liver	Heynen et al 2016. Tissue-specific uptake of the benzodiazepine oxazepam in adult Eurasian perch (Perca fluviatilis). Environmental Chemistry, 13(5), 849-854
1.9	23.8	brain	Heynen et al 2016. Tissue-specific uptake of the benzodiazepine oxazepam in adult Eurasian perch (Perca fluviatilis). Environmental Chemistry, 13(5), 849-855
1.9	35.1	plasma	Heynen et al 2016. Tissue-specific uptake of the benzodiazepine oxazepam in adult Eurasian perch (Perca fluviatilis). Environmental Chemistry, 13(5), 849-856
0.8	7	muscle	Huerta et al 2016. Anti-anxiety drugs and fish behavior: Establishing a link between internal concentrations of oxazepam and behavioral effects. Environmental Toxicology and Chemistry. 35(11), 2782-2790.
0.8	40	brain	Huerta et al 2016. Anti-anxiety drugs and fish behavior: Establishing a link between internal concentrations of oxazepam and behavioral effects. Environmental Toxicology and Chemistry. 35(11), 2782-2790.
0.8	16	liver	Huerta et al 2016. Anti-anxiety drugs and fish behavior: Establishing a link between internal concentrations of oxazepam and behavioral effects. Environmental Toxicology and Chemistry. 35(11), 2782-2790.
0.8	9	plasma	Huerta et al 2016. Anti-anxiety drugs and fish behavior: Establishing a link between internal concentrations of oxazepam and behavioral effects. Environmental Toxicology and Chemistry. 35(11), 2782-2790.
0.84	3	muscle	Brodin et al 2017. Environmental relevant levels of a benzodiazepine (oxazepam) alters important behvioral traits in a common planktivorous fish, (Rutilus rutilus). 1-8.
0.5	3.6	muscle	Brodin et al 2013. Dilute concentrations of a psychiatric drug alter behavior of a fish from natural populations. Science, 339(6121), 814-815
0.7	1.46	muscle	McCallum et al. unpublished data. Tissue-specific bioconcentration of oxazepam in sea trout (salmo trutta)
0.7	3.1	brain	McCallum et al. unpublished data. Tissue-specific bioconcentration of oxazepam in sea trout (salmo trutta)
0.7	8.8	liver	McCallum et al. unpublished data. Tissue-specific bioconcentration of oxazepam in sea trout (salmo trutta)
0.7	1.03	plasma	McCallum et al. unpublished data. Tissue-specific bioconcentration of oxazepam in sea trout (salmo trutta)
4.7	30	plasma	Huerta et al 2016. Anti-anxiety drugs and fish behavior: Establishing a link between internal concentrations of oxazepam and behavioral effects. Environmental Toxicology and Chemistry. 35(11), 2782-2790.
4.7	50	brain	Huerta et al 2016. Anti-anxiety drugs and fish behavior: Establishing a link between internal concentrations of oxazepam and behavioral effects. Environmental Toxicology and Chemistry. 35(11), 2782-2790.
4.7	22	muscle	Huerta et al 2016. Anti-anxiety drugs and fish behavior: Establishing a link between internal concentrations of oxazepam and behavioral effects. Environmental Toxicology and Chemistry. 35(11), 2782-2790.
4.7	39	liver	Huerta et al 2016. Anti-anxiety drugs and fish behavior: Establishing a link between internal concentrations of oxazepam and behavioral effects. Environmental Toxicology and Chemistry. 35(11), 2782-2790.
1.9	12	muscle	Hellstrom et al 2016. GABAergic anxiolytic drug in water increases migration behaviour in salmon. Nature Communications, 7, 13460.
1.2	7.4	muscle	Klaminder et al 2014. The conceptual imperfection of aquatic risk assessment tests: highlighting the need for tests designed to detect therapeutic effects of pharmaceuticals contaminants. Environmental Research Letters, 9, 1-7.
3.7	10.3	muscle	Heynen et al 2016. Tissue-specific uptake of the benzodiazepine oxazepam in adult Eurasian perch (Perca fluviatilis). Environmental Chemistry, 13(5), 849-853
3.7	22.9	liver	Heynen et al 2016. Tissue-specific uptake of the benzodiazepine oxazepam in adult Eurasian perch (Perca fluviatilis). Environmental Chemistry, 13(5), 849-854
3.7	30.2	brain	Heynen et al 2016. Tissue-specific uptake of the benzodiazepine oxazepam in adult Eurasian perch (Perca fluviatilis). Environmental Chemistry, 13(5), 849-855
3.7	65.5	plasma	Heynen et al 2016. Tissue-specific uptake of the benzodiazepine oxazepam in adult Eurasian perch (Perca fluviatilis). Environmental Chemistry, 13(5), 849-856
12.2	41.8	muscle	Heynen et al 2016. Tissue-specific uptake of the benzodiazepine oxazepam in adult Eurasian perch (Perca fluviatilis). Environmental Chemistry, 13(5), 849-853
12.2	133.9	liver	Heynen et al 2016. Tissue-specific uptake of the benzodiazepine oxazepam in adult Eurasian perch (Perca fluviatilis). Environmental Chemistry, 13(5), 849-854
12.2	121.5	brain	Heynen et al 2016. Tissue-specific uptake of the benzodiazepine oxazepam in adult Eurasian perch (Perca fluviatilis). Environmental Chemistry, 13(5), 849-855
12.2	292.6	plasma	Heynen et al 2016. Tissue-specific uptake of the benzodiazepine oxazepam in adult Eurasian perch (Perca fluviatilis). Environmental Chemistry, 13(5), 849-856
20.2	69.1	muscle	Heynen et al 2016. Tissue-specific uptake of the benzodiazepine oxazepam in adult Eurasian perch (Perca fluviatilis). Environmental Chemistry, 13(5), 849-853
20.2	133.9	liver	Heynen et al 2016. Tissue-specific uptake of the benzodiazepine oxazepam in adult Eurasian perch (Perca fluviatilis). Environmental Chemistry, 13(5), 849-854
20.2	201.3	brain	Heynen et al 2016. Tissue-specific uptake of the benzodiazepine oxazepam in adult Eurasian perch (Perca fluviatilis). Environmental Chemistry, 13(5), 849-855
20.2	428.8	plasma	Heynen et al 2016. Tissue-specific uptake of the benzodiazepine oxazepam in adult Eurasian perch (Perca fluviatilis). Environmental Chemistry, 13(5), 849-856
30.6	99	plasma	Huerta et al 2016. Anti-anxiety drugs and fish behavior: Establishing a link between internal concentrations of oxazepam and behavioral effects. Environmental Toxicology and Chemistry. 35(11), 2782-2790.
30.6	147	brain	Huerta et al 2016. Anti-anxiety drugs and fish behavior: Establishing a link between internal concentrations of oxazepam and behavioral effects. Environmental Toxicology and Chemistry. 35(11), 2782-2790.
30.6	82	muscle	Huerta et al 2016. Anti-anxiety drugs and fish behavior: Establishing a link between internal concentrations of oxazepam and behavioral effects. Environmental Toxicology and Chemistry. 35(11), 2782-2790.
30.6	171	liver	Huerta et al 2016. Anti-anxiety drugs and fish behavior: Establishing a link between internal concentrations of oxazepam and behavioral effects. Environmental Toxicology and Chemistry. 35(11), 2782-2790.
1.5	5.8	muscle	Klaminder et al 2016. Drug-induced behavioral changes: Using laboratory observations to predict field observations. Frontiers in Environmental Science, 4,1-9
280	296	muscle	Brodin et al 2017. Environmental relevant levels of a benzodiazepine (oxazepam) alters important behvioral traits in a common planktivorous fish, (Rutilus rutilus). 1-8.
910	4900	muscle	Brodin et al 2013. Dilute concentrations of a psychiatric drug alter behavior of a fish from natural populations. Science, 339(6121), 814-815
2.1	25.7	muscle	Brodin et al. 2014. Ecological effects of pharmaceuticals in aquatic systems - impacts through behavioural alterations. Philisophical Transactions of the Royal Society B: Biological Sciences. 369,20130580.
1.57	6	muscle	Heynen et al 2016. Effect of bioconcentratoin and trophic transfer on the realzied exposure to oxazepam in 2 predatorys, the dragonflu larvae (Aeshna grandis) and the Eurasian perch (Perca fluviatilis). Environmental Toxicology and Chemistry, 35(4), 930-937
